# Supplementary material
Source: HighWire-hosted journal article supplement (https://bmjopen.bmj.com/content/7/9/e016954)
Supplement: inline-supplementary-material-1 [file inline-supplementary-material-1.pdf]

**Conceptual Framework:**

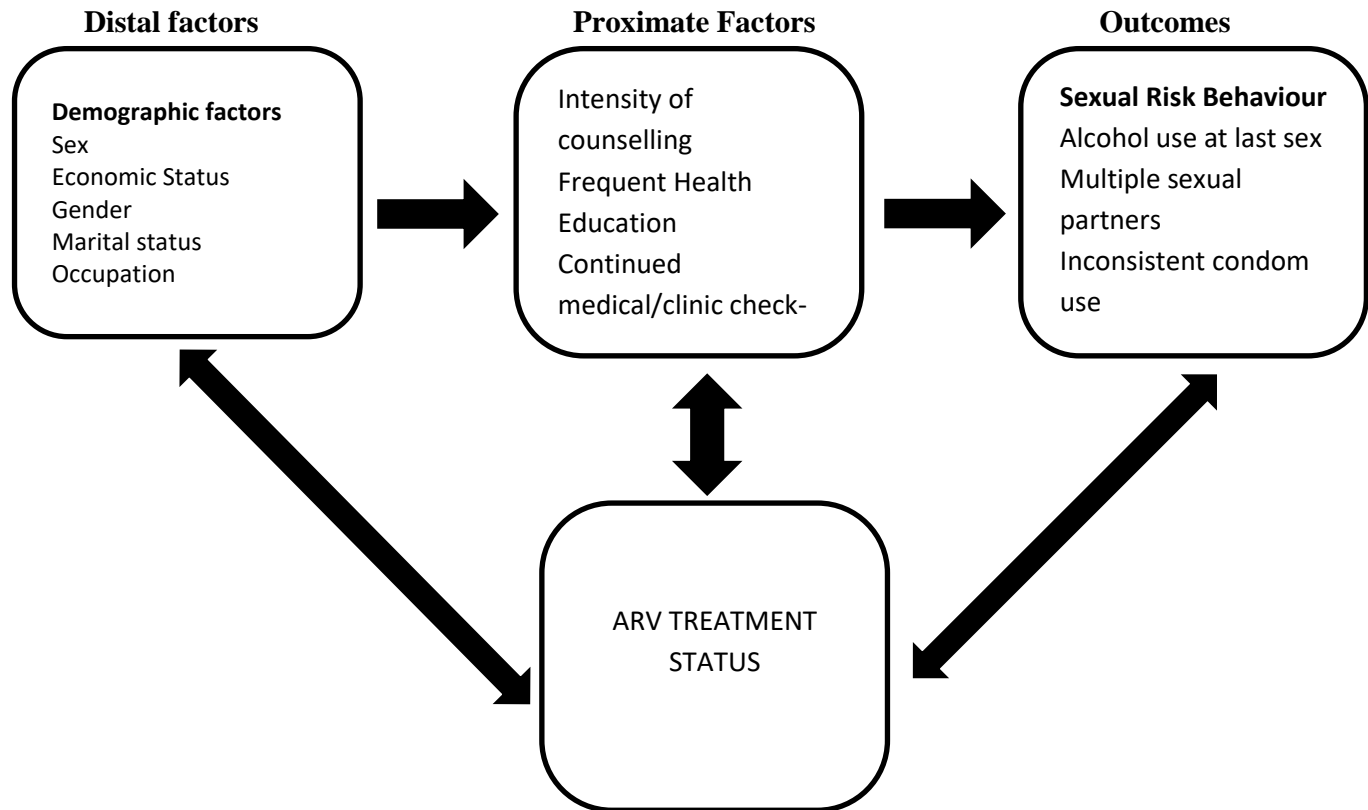

Figure 1: Conceptual framework showing the relationship between factors that may contribute to differences in sexual risk behaviours among HIV positive persons in rural Rakai, Uganda
